# Supplementary material
Source: HighWire-hosted journal article supplement (https://www.cmajopen.ca/highwire/filestream/89774/field_highwire_adjunct_files/1/open-2021-0203-original-submission.pdf)

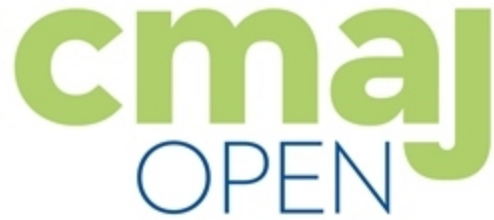

**Academic Half Days, Noon Conferences, and Classroom-Based Education in Postgraduate Medical Education: A Scoping Review**

|                               |                                                                                                                                                                                                                                                                                                                                                                                                                                                                                                                                                                                                                                                                                                                                                                                                                                                                                                                                                                                                                                                                                                                                                                                                                                                                                                                                                                                                                                                                                                                                                                                                                                                                                                                                                                                                                         |
|-------------------------------|-------------------------------------------------------------------------------------------------------------------------------------------------------------------------------------------------------------------------------------------------------------------------------------------------------------------------------------------------------------------------------------------------------------------------------------------------------------------------------------------------------------------------------------------------------------------------------------------------------------------------------------------------------------------------------------------------------------------------------------------------------------------------------------------------------------------------------------------------------------------------------------------------------------------------------------------------------------------------------------------------------------------------------------------------------------------------------------------------------------------------------------------------------------------------------------------------------------------------------------------------------------------------------------------------------------------------------------------------------------------------------------------------------------------------------------------------------------------------------------------------------------------------------------------------------------------------------------------------------------------------------------------------------------------------------------------------------------------------------------------------------------------------------------------------------------------------|
| Journal:                      | <i>CMAJ Open</i>                                                                                                                                                                                                                                                                                                                                                                                                                                                                                                                                                                                                                                                                                                                                                                                                                                                                                                                                                                                                                                                                                                                                                                                                                                                                                                                                                                                                                                                                                                                                                                                                                                                                                                                                                                                                        |
| Manuscript ID                 | CMAJOpen-2021-0203                                                                                                                                                                                                                                                                                                                                                                                                                                                                                                                                                                                                                                                                                                                                                                                                                                                                                                                                                                                                                                                                                                                                                                                                                                                                                                                                                                                                                                                                                                                                                                                                                                                                                                                                                                                                      |
| Manuscript Type:              | Other                                                                                                                                                                                                                                                                                                                                                                                                                                                                                                                                                                                                                                                                                                                                                                                                                                                                                                                                                                                                                                                                                                                                                                                                                                                                                                                                                                                                                                                                                                                                                                                                                                                                                                                                                                                                                   |
| Date Submitted by the Author: | 06-Aug-2021                                                                                                                                                                                                                                                                                                                                                                                                                                                                                                                                                                                                                                                                                                                                                                                                                                                                                                                                                                                                                                                                                                                                                                                                                                                                                                                                                                                                                                                                                                                                                                                                                                                                                                                                                                                                             |
| Complete List of Authors:     | Chen, Luke; University of British Columbia, Hematology<br>Quach, Tien; The University of British Columbia<br>Dayan, Riki; The University of British Columbia<br>Giustini, Dean; University of BC, UBC Library<br>Teunissen, Pim; Maastricht UMC+                                                                                                                                                                                                                                                                                                                                                                                                                                                                                                                                                                                                                                                                                                                                                                                                                                                                                                                                                                                                                                                                                                                                                                                                                                                                                                                                                                                                                                                                                                                                                                        |
| Keywords:                     | Medical education                                                                                                                                                                                                                                                                                                                                                                                                                                                                                                                                                                                                                                                                                                                                                                                                                                                                                                                                                                                                                                                                                                                                                                                                                                                                                                                                                                                                                                                                                                                                                                                                                                                                                                                                                                                                       |
| More Detailed Keywords:       | academic half days, posgraduate medical education, didactics, threshold concepts, noon conference, classroom based education                                                                                                                                                                                                                                                                                                                                                                                                                                                                                                                                                                                                                                                                                                                                                                                                                                                                                                                                                                                                                                                                                                                                                                                                                                                                                                                                                                                                                                                                                                                                                                                                                                                                                            |
| Abstract:                     | <p>Background: Classroom-based education (CBE) is a ubiquitous component of postgraduate medical education (PGME), but to date no studies have synthesized the heterogeneous literature on this topic.</p> <p>Methods: We conducted a scoping review, focusing on Academic Half Days (AHDs) and Noon Conferences (NCs). We searched Medline, Embase, ERIC, and Web of Science, and performed reference and citation harvesting. Included articles were classified as "description, justification, or clarification" as well as their main level of analysis according to the "experiences, trajectories and reifications" framework.</p> <p>Results: Eighty eight articles were included: 42 "description", 38 "justification", and eight "clarification". Description papers compared AHDs to NCs (12), described specific topics (21), and the resources required for CBE (9). Justification studies examined the effectiveness of CBE on outcomes such as exam scores (23), and teaching strategies such as team-based learning, principles of adult learning, and e-learning (15). Clarification studies explored the role of CBE in PGME (3), stakeholder perspectives (3), and transfer of knowledge between classroom and workplace (2). Description and justification studies focused on resident experiences or trajectories as the main level of analysis using an individual, cognitivist lens, whereas clarification studies focused on the reification of resident learning in the classroom.</p> <p>Interpretation: Much of the existing literature is either a description of various aspects of CBE or a justification of particular approaches to teaching and learning; relatively few studies aim to clarify how and why CBE works. Studies that clarify how CBE could or should affect resident</p> |

1  
2  
3  
4  
5  
6  
7  
8  
9  
10  
11  
12  
13  
14  
15  
16  
17  
18  
19  
20  
21  
22  
23  
24  
25  
26  
27  
28  
29  
30  
31  
32  
33  
34  
35  
36  
37  
38  
39  
40  
41  
42  
43  
44  
45  
46  
47  
48  
49  
50  
51  
52  
53  
54  
55  
56  
57  
58  
59  
60

|  |                                                                    |
|--|--------------------------------------------------------------------|
|  | learning trajectories within a sociocultural framework are needed. |
|  |                                                                    |

SCHOLARONE™  
Manuscripts

1  
2  
3 Because this is a scoping review, I do not see a relevant checklist in the CMAJ Open instructions to  
4 authors.  
5

6 I do see that a scoping review was very recently published in CMAJ Open <sup>1</sup>; if there is a checklist  
7 followed by that paper we would be very happy to include it.  
8  
9  
10

- 11  
12 1. Moss SJ, Wollny K, Amarbayan M, Lorenzetti DL, Kassam A. Interventions to improve the well-  
13 being of medical learners in Canada: a scoping review. *CMAJ Open*. 2021;9:E765-E76.  
14  
15  
16  
17  
18  
19  
20  
21  
22  
23  
24  
25  
26  
27  
28  
29  
30  
31  
32  
33  
34  
35  
36  
37  
38  
39  
40  
41  
42  
43  
44  
45  
46  
47  
48  
49  
50  
51  
52  
53  
54  
55  
56  
57  
58  
59  
60

Confidential

1  
2  
3  
4 1 **Academic Half Days, Noon Conferences, and Classroom-Based Education in**  
5 2 **Postgraduate Medical Education: A Scoping Review**

6  
7 3 Luke Y. C. Chen, MD, MMed<sup>1, 2</sup>

8  
9 4 Tien T. T. Quach, MSc<sup>1</sup>

10  
11 5 Riki Dayan, MD<sup>3</sup>

12  
13 6 Dean Giustini, MLS, MEd<sup>4</sup>

14  
15 7 Pim W. Teunissen, MD, PhD<sup>5,6</sup>

16  
17 8 <sup>1</sup>Centre for Health Education Scholarship (CHES), University of British Columbia

18  
19 9 <sup>2</sup>Division of Hematology, University of British Columbia

20  
21 10 <sup>3</sup>Department of Obstetrics and Gynaecology, University of British Columbia

22  
23 11 <sup>4</sup>Biomedical Branch Library, University of British Columbia

24  
25 12 <sup>5</sup>School of Health Professions Education (SHE), Faculty of Health Medicine and Life Sciences,  
26 13 Maastricht University

27  
28 14 <sup>6</sup>Department of Obstetrics and Gynecology, Maastricht University Medical Centre, Maastricht,  
29 15 Netherlands

30  
31 16 Correspondence: Luke Chen, MD, MMed, Hematology Training Program Director, Division of  
32 17 Hematology and Centre for Health Education Research, University of British Columbia.

33  
34 18 Address: 2775 Laurel St, 10<sup>th</sup> Floor, Vancouver General Hospital, Vancouver, British Columbia,  
35 19 Canada, V5Z 1M9

36  
37 20 Tel: 1 604 875 4863

38  
39 21 Fax: 1 604 875 4763

40  
41 22 Email: [lchen2@bccancer.bc.ca](mailto:lchen2@bccancer.bc.ca)

42

43 24 Running title: classroom education in residency review

44  
45 25 Keywords: classroom-based education, Academic Half Days, Noon Conference; didactics;  
46 26 postgraduate medical education; residency

47  
48 27 Abstract word count: 247

49  
50 28 Word count: 4303

51  
52 29 Tables/Figures): 3/2

53  
54 30 Supplemental appendices: 0

55

56

57

58

59

60

1  
2  
3  
4  
5  
6  
7  
8  
9  
10  
11  
12  
13  
14  
15  
16  
17  
18  
19  
20  
21  
22  
23  
24  
25  
26  
27  
28  
29  
30  
31  
32  
33  
34  
35  
36  
37  
38  
39  
40  
41  
42  
43  
44  
45  
46  
47  
48  
49  
50  
51  
52  
53  
54  
55  
56  
57  
58  
59  
60

## 31 **Abstract**

32 **Background:** Classroom-based education (CBE) is a ubiquitous component of postgraduate  
33 medical education (PGME), but to date no studies have synthesized the heterogeneous  
34 literature on this topic.

35 **Methods:** We conducted a scoping review, focusing on Academic Half Days (AHDs) and Noon  
36 Conferences (NCs). We searched Medline, Embase, ERIC, and Web of Science, and performed  
37 reference and citation harvesting. Included articles were classified as “description, justification,  
38 or clarification” as well as their main level of analysis according to the “experiences, trajectories  
39 and reifications” framework.

40 **Results:** Eighty eight articles were included: 42 “description”, 38 “justification”, and  
41 eight “clarification”. Description papers compared AHDs to NCs (12), described specific topics  
42 (21), and the resources required for CBE (9). Justification studies examined the effectiveness of  
43 CBE on outcomes such as exam scores (23), and teaching strategies such as team-based  
44 learning, principles of adult learning, and e-learning (15). Clarification studies explored the role  
45 of CBE in PGME (3), stakeholder perspectives (3), and transfer of knowledge between classroom  
46 and workplace (2). Description and justification studies focused on resident experiences or  
47 trajectories as the main level of analysis using an individual, cognitivist lens, whereas  
48 clarification studies focused on the reification of resident learning in the classroom.

49 **Interpretation:** Much of the existing literature is either a description of various aspects of CBE  
50 or a justification of particular approaches to teaching and learning; relatively few studies aim to

1  
2  
3  
4  
5  
6  
7  
8  
9  
10  
11  
12  
13  
14  
15  
16  
17  
18  
19  
20  
21  
22  
23  
24  
25  
26  
27  
28  
29  
30  
31  
32  
33  
34  
35  
36  
37  
38  
39  
40  
41  
42  
43  
44  
45  
46  
47  
48  
49  
50  
51  
52  
53  
54  
55  
56  
57  
58  
59  
60

51 clarify how and why CBE works. Studies that clarify how CBE could or should affect resident  
52 learning trajectories within a sociocultural framework are needed.

53

Confidential

## 54 **Background**

55 Workplace learning centered on authentic participation in patient care is the foundation  
56 of postgraduate medical education (PGME).<sup>1,2</sup> Many residency programs supplement this  
57 foundation with regularly scheduled classroom-based education (CBE) such as Academic Half  
58 Days or Noon Conferences. While workplace learning and classroom-based education are  
59 meant to complement each other, they are often perceived to compete for trainees' time and  
60 attention.<sup>3</sup> Residents frequently report that there is an overabundance of "service" in their  
61 training programs and they are more likely to privilege formal learning opportunities  
62 ("education") such as lectures over the more assimilative learning that occurs through work.<sup>4</sup>  
63 Ensuring that the activities residents engage in, whether in the workplace or the classroom,  
64 facilitate effective learning alongside high quality patient care, is an ongoing challenge.  
65 Moreover, as many countries shift towards competence-based medical education, with  
66 emphasis on work-based assessment, re-evaluating the role of CBE in residency will be essential  
67 to planning optimal educational and assessment programs in PGME.

68 The service-education tension highlights the interface between acting and learning, an  
69 interface which is well described by the Experiences-Trajectories-Reifications (ETR) framework.  
70 In this framework, situations lead to **experiences**; individuals may use their experiences to  
71 embark on different developmental **trajectories**. The intersection of, and interaction between,  
72 these individual trajectories in the workplace context leads to the **reification** of practice and the  
73 learning within practice.<sup>5</sup> Wenger defines the concept of reification in a general sense as "the  
74 process of giving form to our experience by producing objects that congeal this experience into

1  
2  
3 75 ‘thingness’’.<sup>6</sup> Reification means both the processes and the products (or objects/artifacts) by  
4  
5  
6 76 which we enact our daily practice. An common example is residents dictating discharge  
7  
8 77 summaries, which is both a process and a product by which medical practice is reified. Practice  
9  
10  
11 78 both creates, and is created by, recurring patterns of activities which are the result of, and  
12  
13 79 shape, our experiences and possible trajectories.

14  
15  
16 80 Classroom-based education can help shape the interpretation and reification of clinical  
17  
18 81 experiences.<sup>7</sup> For example, a resident on overnight call may have a string of **experiences**  
19  
20  
21 82 including seeing her first case of lobar pneumonia and presenting the case at “Noon  
22  
23 83 Conference” later in the week. This conference affords opportunities for reflection and  
24  
25  
26 84 knowledge acquisition; she may learn subtle aspects of microbiology and pharmacology that  
27  
28 85 were not considered previously, when her focus was on urgent patient care decisions. In  
29  
30  
31 86 combination, these experiences facilitate a **trajectory** towards becoming a competent  
32  
33 87 physician. This repetition of discrete experiences, presented subsequently in the classroom  
34  
35  
36 88 context, can **reify** both the importance of overnight call as an educational activity (and not just  
37  
38 89 “service”) as well as the complementary role of classroom-based education for gaining in-depth  
39  
40  
41 90 knowledge.

42  
43  
44 91 While the theoretical underpinning of workplace learning has been extensively studied  
45  
46 92 in PGME,<sup>8-10</sup> less is known about the role of classroom-based education. This relative neglect  
47  
48 93 may be related to the belief that lectures are a passive mode of learning and inferior to “hands-  
49  
50  
51 94 on” activities or self-directed learning, especially for experienced, adult learners. In the 19<sup>th</sup>  
52  
53 95 century, Sir William Osler posited that bedside teaching and self-study were superior in general  
54  
55  
56 96 to lectures.<sup>11</sup> More recently, the notions that “brain activity” during and “retention” after



1  
2  
3 97 lectures is poor have pervaded the educational literature. However, these assertions are based  
4  
5  
6 98 more on theory than evidence, and have been challenged.<sup>12,13</sup> At present, there is no  
7  
8  
9 99 compelling argument either for or against classroom-based education in residency.

10  
11 100 Nonetheless, lectures and other classroom activities are widely used in PGME and are in fact  
12  
13 101 required by some accreditation bodies. For example, the American Accreditation Council for  
14  
15 102 Postgraduate Medical Education (ACGME) common program requirements stipulate that there  
16  
17 103 should be “regularly scheduled didactic sessions” (IV.A.3).<sup>14</sup> Likewise, Canada’s CanRAC  
18  
19 104 accreditation standards indicate that there should be “a variety of learning activities in the  
20  
21 105 curriculum plan addressing each of the CanMEDS/CanMEDS-FM roles for any given program  
22  
23 106 including, but not limited to, ...seminars... journal clubs, research conferences...:and others, as  
24  
25 107 appropriate (3.2.2.3).”<sup>15</sup> The competing views of CBE as passive and ineffective yet required for  
26  
27 108 accreditation beg the question of what role, if any, it has to play in 21<sup>st</sup> century residency  
28  
29 109 training. Moreover, the heterogeneity of CBE, as illustrated by the different types of CBE listed  
30  
31 110 in the CanMEDS standards quoted above, make it difficult to gather and study this body of  
32  
33 111 literature. Given these uncertainties and gaps in the existing literature, we conducted a scoping  
34  
35 112 review in order to:

- 36  
37  
38  
39  
40  
41  
42  
43 113 1) Illustrate the extent of existing literature of classroom-based learning, particularly  
44  
45 Academic Half Days and Noon Conferences, in resident education  
46 114  
47  
48 115 2) Elucidate the role of classroom-based learning in postgraduate medical education  
49  
50  
51 116 3) Highlight priorities for future study.

1  
2  
3 117 The literature search focused on Academic Half Days and Noon Conferences, which are  
4  
5  
6 118 common types of CBE in Canada in the United States. Our stance is that learning in residency is  
7  
8 119 social and participatory rather than solely a matter of individual acquisition of knowledge or  
9  
10 120 skills.<sup>16</sup> Thus, in this review we will examine both individual, cognitive aspects as well as  
11  
12  
13 121 sociocultural aspects of the CBE literature.  
14  
15

16 122  
17  
18  
19  
20  
21  
22  
23  
24  
25  
26  
27  
28  
29  
30  
31  
32  
33  
34  
35  
36  
37  
38  
39  
40  
41  
42  
43  
44  
45  
46  
47  
48  
49  
50  
51  
52  
53  
54  
55  
56  
57  
58  
59  
60

Confidential

## 123 **Methods**

### 124 **Literature search and study selection**

125 Our scoping review was guided by Arksey and O'Malley's paper from 2005, and other key  
126 papers.<sup>17-21</sup> As the research questions we sought to answer were quite broad, and the body of  
127 literature quite heterogeneous, we decided a scoping review would be more suitable than a  
128 systematic review, as the latter is better suited for a narrow, well defined question with studies  
129 that are more homogeneous in methodology and outcomes. We searched three bibliographic  
130 databases that index journals and research in medical education: Medline and EMBASE on Ovid,  
131 and ERIC (Education Resources Information Center) using EBSCO from inception to March 2021.  
132 We restricted our searches to English language articles, but did not impose date restrictions.  
133 Our search terms included a combination of controlled terms and text words such as academic  
134 half day\*; morning conference\*, noon conference\*; flipped classroom\*; resident lecture\* etc.  
135 and postgraduate medical education. (see Figure 1 for the search strategy). To increase our  
136 search sensitivity, we performed reference harvesting in the references of included papers, and  
137 citation searching of those same papers in the Web of Science Core Collection and Google  
138 Scholar. We included full articles relevant to classroom-based education in postgraduate  
139 medical education. Two authors (TQ and LC) developed an iterative screening process based on  
140 the inclusion criteria to determine the final set of studies to review (see Figure 2 for the PRISMA  
141 diagram). We did not perform an evaluation of study quality.

### 142 **Boundaries and limits of the search**

1  
2  
3 143 The focus of this review is on traditional face to face classroom-based education. Three  
4  
5  
6 144 topics that overlap with, but are not the focus of, this review are simulation, e-learning (or  
7  
8 145 blended learning) and flipped classrooms. Each topic is discussed, but we did not conduct an  
9  
10 146 exhaustive review of these areas because they were not our focus in face-to-face teaching and  
11  
12  
13 147 learning, and because high quality reviews already exist in these areas (e.g. for simulation, see  
14  
15 148 <sup>22</sup>; for e-learning, or blended learning, see <sup>23</sup> and <sup>24</sup>; for flipped classrooms see <sup>25,26</sup> and <sup>27</sup>).

### 18 149 **Mapping, classification and grouping**

20  
21  
22 150 We felt the “description, justification, and clarification” framework for classifying the  
23  
24 151 purposes of medical education research would be pertinent to this review.<sup>28</sup> Description  
25  
26 152 studies address the question: “What was done?” Justification studies ask: “Did it work?”  
27  
28  
29 153 Clarification studies ask: “Why or how did it work?” Each included paper was classified by two  
30  
31 154 authors (LC and TQ), according to its main purpose, within this scheme. Disagreements were  
32  
33  
34 155 resolved by discussion. Next, each paper was also evaluated on its main level(s) of analysis with  
35  
36 156 respect to the ETR framework by LC and TQ. This two-step process created insight in the type  
37  
38  
39 157 of research as well as the way in which it addressed the contribution of classroom-based  
40  
41 158 education to resident learning. Although other theories, such as the socio-cultural theories  
42  
43  
44 159 reviewed by Cleland and Durning are certainly applicable to this body of literature,<sup>4</sup> we felt that  
45  
46 160 these two frameworks were practical and suitable for this review.

### 49 161 **Results**

51  
52  
53 162 We screened 479 unique full text articles, and identified 88 articles that met our inclusion  
54  
55 163 criteria (Figure 2). Most of the included articles were from Canada and the USA, three were  
56  
57  
58  
59  
60

1  
2  
3 164 from Europe,<sup>29-31</sup> and one from Thailand.<sup>32</sup> Three studies reported on collaborations between  
4  
5 165 North American or European and African training programs.<sup>33-35</sup> Studies from numerous  
6  
7  
8 166 specialties, including Anesthesia, Surgery, Pediatrics, Internal Medicine, Family Practice and  
9  
10 167 Psychiatry were included. The results of the review are structured as follows:

- 13 168 1. Whether the purpose of the study is description, justification, or clarification
- 14 169 2. The main level(s) of analysis in the paper according to the Experiences, Trajectories and  
15  
16 170 Reification (ETR) framework
- 17  
18 171 3. The principle research topics or questions addressed by the study
- 19  
20  
21  
22

23  
24 172 Tables 1-3 provides an overview of the included studies, grouped according to this structure.

25  
26 173 Forty two were deemed description articles, 38 were justification, and eight were clarification.

## 27 28 29 174 **I. Description**

30  
31  
32 175 Among the description papers (Table 1), some focused on CBE format, for example  
33  
34 176 transition from Noon Conference to Academic Half Day; some focused on specific content or  
35  
36 177 topics for CBE, and others on the resources required to create and maintain CBE. The level of  
37  
38 178 analysis in nearly all these papers was on the *experiences* of trainees.

### 39 40 41 42 179 **a. CBE Format:**

43  
44  
45 180 The relative merits of blocked versus dispersed formats are a recurring theme. Dispersed  
46  
47 181 formats are commonly called “Noon Conferences” or “Academic Conferences” and are regular,  
48  
49 182 short (e.g. 30 min-90 min) sessions occurring multiple times a week. Blocked formats. are  
50  
51 183 called “Academic Half Days” (AHDs), “Blocked Conferences” or “Extended Educational  
52  
53  
54  
55  
56  
57  
58  
59  
60

1  
2  
3 184 Sessions”, and are longer, less frequent (e.g. weekly 3-5 hour) sessions.<sup>36</sup>. Dispersed formats  
4  
5  
6 185 entail minimal interruption of acute clinical services, in that residents are typically on-site at  
7  
8 186 academic hospitals and the sessions are typically only an hour. In contrast, blocked formats  
9  
10  
11 187 typically require that attending physicians or other providers cover the clinical services as  
12  
13 188 residents are excused for 3-4 hours (or more) of “protected time”. Blocked formats emerged  
14  
15  
16 189 from American rural family medicine programs in the 1990s as an alternative to dispersed  
17  
18 190 formats with the purpose of improving attendance and facilitating novel educational methods  
19  
20 191 such as simulation.<sup>37,38</sup> AHDs have become quite common in North America; for example, 20 of  
21  
22  
23 192 21 Canadian Neurology programs had an AHD in 2003,<sup>36</sup> and 55.6% of American Family Practice  
24  
25 193 programs had one in 2016.<sup>39</sup>

26  
27  
28 194 Other broad categories of classroom-based education may include other trainees (e.g.  
29  
30 195 medical students) and faculty, often with presentation or discussion of a contemporaneous  
31  
32  
33 196 clinical case. For example, many programs have a “Morning Report” wherein a case from the  
34  
35  
36 197 previous call shift or recent admission is discussed.<sup>40,41</sup> Morbidity and Mortality (M and M)  
37  
38 198 rounds are an opportunity to discuss adverse events with the intention of improving quality and  
39  
40  
41 199 reducing medical errors.<sup>29,42</sup> Many programs include Journal Clubs to teach evidence-based  
42  
43 200 medicine and enhance medical literature critical appraisal skills.<sup>43</sup>

#### 44 45 46 201 **b. CBE content and topics**

47  
48  
49 202 Many articles described specific topics delivered in the classroom setting, which ranged  
50  
51  
52 203 from traditional disease and medical expert topics such as insulin pump use,<sup>44</sup> and prescribing  
53  
54 204 psychopharmacological interventions,<sup>45</sup> to other competencies such as communication skills,  
55  
56  
57  
58  
59  
60

1  
2  
3 205 transition to practice, and patient safety.<sup>34,46,47</sup> Many of these descriptive studies focused on  
4  
5  
6 206 non-traditional topics or topics thought to be under-appreciated in PGME such as global health  
7  
8 207 and surgical safety. ACGME and CanMEDS standards are often cited as the impetus for non-  
9  
10 208 medical expert topics.<sup>47,48</sup>

13  
14 209 **c. Resources required for CBE**

15  
16  
17 210 Classroom-based education requires faculty, administrative, and infrastructure resources.  
18  
19 211 One academic Psychiatry training program implemented a twice annual AHD for faculty  
20  
21 212 development that “flipped” the usual resident and faculty roles, in that residents would cover  
22  
23 213 the clinical services and faculty members attended faculty development sessions on topics such  
24  
25 214 as new accreditation standards and clinical teaching methods.<sup>49</sup> Near-peer and peer-to-peer  
26  
27 215 teaching is perceived by residents to be both effective and sustainable and is one method of  
28  
29 216 decreasing faculty teaching load.<sup>50</sup> As Family Practice has evolved from the concept of general  
30  
31 217 practice into a distinct academic discipline, the proportion of Family Practice lecturers in  
32  
33 218 American Family Practice didactic sessions has increased from 7% in 2000 to 40% in 2015.<sup>39,51</sup>  
34  
35 219 One pediatric residency program reported that provision of lunch with Noon Conference was  
36  
37 220 associated with statistically significant improvements in attendance and punctuality.<sup>52</sup> One  
38  
39 221 recent article described virtual conferences in the era of COVID-19.<sup>53</sup>  
40  
41  
42  
43  
44  
45  
46  
47  
48  
49

50 223 **II. Justification**

51  
52  
53 224 Justification studies were nearly all surveys and quasi-experimental before/after intervention  
54  
55 225 studies examining the effectiveness of CBE as well as different teaching strategies (Table 2).  
56  
57  
58  
59  
60

1  
2  
3 226 The outcomes examined in these studies included in-training examination scores and resident  
4  
5  
6 227 satisfaction. None of the studies examined patient care outcomes. Most of the justification  
7  
8 228 studies focused their analysis on the learning trajectories of residents.  
9

10  
11 229 **a. Effectiveness of CBE**  
12  
13

14 230 Residents reported that they were more likely to attend lectures and pursue self-directed  
15  
16  
17 231 learning when topics were clinically relevant, well presented, and focused on clinical  
18  
19 232 reasoning.<sup>54</sup> Two studies found a positive association between Noon Conference attendance  
20  
21 233 and in-training exam scores,<sup>55,56</sup> whereas four did not.<sup>57-60</sup> Transitioning from Noon  
22  
23  
24 234 Conference to AHD was associated with improvements in resident attendance, satisfaction, as  
25  
26 235 well as improved in-training exam scores in some studies.<sup>61-63</sup> One prospective cohort study  
27  
28 236 comparing dispersed vs massed delivery of a nutrition course for gastroenterology fellows  
29  
30 237 demonstrated better long term knowledge in the dispersed cohort.<sup>64</sup> Likewise, a randomized  
31  
32  
33 238 interventional study of 122 residents in Pediatric Emergency Medicine reported improved test  
34  
35  
36 239 scores in those who participated in a web-based, dispersed educational program compared to  
37  
38  
39 240 the traditional program.<sup>65</sup>  
40

41  
42 241 **b. Teaching strategies**  
43  
44

45 242 Many studies focusing on teaching strategies were motivated by poor resident attendance,  
46  
47 243 difficulty planning CBE, and lack of perceived resident and faculty engagement in classroom  
48  
49 244 learning. These studies aimed to revive or refresh attendance and impact of their classroom-  
50  
51 245 based learning by applying principles of andragogy and active learning.<sup>66-68</sup> A qualitative study  
52  
53  
54 246 revealed that faculty often wish to present all the key information in their area of interest  
55  
56  
57  
58  
59  
60



1  
2  
3 247 during Noon Conference, whereas residents prefer a few key teaching points and more time for  
4  
5  
6 248 questions and discussion.<sup>69</sup> Team-based learning improved resident engagement and  
7  
8 249 satisfaction in a Pediatrics program.<sup>70</sup> The wide availability of web-based resources has  
9  
10 250 facilitated use of the flipped classroom model in several programs.<sup>30,71,72</sup> Videos have been  
11  
12  
13 251 used in CBE to enhance teaching of topics such as bone marrow biopsy and communication  
14  
15 252 skills.<sup>48,73</sup>  
16  
17

### 18 253 **III. Clarification**

20  
21 254 A few studies were aimed at clarifying issues in CBE (Table 3). These included studies examining  
22  
23  
24 255 the role of CBE in resident education, the perspectives of faculty and residents on CBE, and the  
25  
26 256 issue of learning transfer between classroom and workplace. All three levels of the ETR  
27  
28  
29 257 framework were found in the clarification papers, and many focused on the reification of  
30  
31 258 learning in the classroom setting.  
32  
33

#### 34 259 **a. The role of CBE in resident education**

35  
36  
37 260 One of the few multi-center studies examined the transition from Noon Conference to AHD  
38  
39  
40 261 in three Internal Medicine programs.<sup>74</sup> This study retrospectively identified six core principles  
41  
42 262 for implementation of classroom based education (Box 1). In identifying these principles, the  
43  
44  
45 263 investigators reified what they intended CBE in their institutions to be.  
46

47 264 Box 1: Six core principles for implementing CBE in PGME<sup>74</sup>  
48  
49

50  
51 (1) protect time and space to facilitate learning  
52

53 (2) nurture active learning in residents  
54  
55  
56  
57  
58  
59  
60

1  
2  
3 (3) choose and sequence curricular content deliberately  
4

5  
6 (4) develop faculty  
7

8 (5) encourage resident preparation and accountability for learning  
9

10 (6) employ a continuous improvement approach to curriculum development and evaluation  
11  
12

13 265

14  
15  
16 266 A qualitative study of residents from Internal medicine, Orthopedic Surgery, and  
17  
18 267 Hematology provides empiric evidence that residents believe knowledge acquisition is the  
19  
20 268 primary purpose of CBE.<sup>3</sup> More specifically, residents felt that learning in the classroom should  
21  
22 269 complement learning from the workplace and guide self-directed learning. Moreover, CBE  
23  
24 270 provides an important space for social support and forming communities of practice within  
25  
26 271 residency programs. For residents who rotate through many different disciplines and training  
27  
28 272 sites, CBE can provide an academic “home base”, important to their individual professional  
29  
30 273 identity formation.<sup>7</sup>  
31  
32  
33  
34  
35

36 274

37  
38  
39 275 **b. Faculty and resident perspectives on CBE**  
40

41  
42 276 Two studies, both from the University of Colorado, examined faculty perspectives of CBE.  
43  
44 277 One found that faculty value the opportunity to get to know residents in smaller group  
45  
46 278 classroom sessions, but struggle to ascertain the optimal content for AHD in the context of the  
47  
48 279 rest of the curriculum and were uncertain about the long-term impact of their teaching.<sup>75</sup> A  
49  
50 280 second study focused on the impact of resident AHD on faculty, which included increased  
51  
52 281 emotional strain in having to deal with ward issues while residents were away and challenges in  
53  
54  
55  
56  
57  
58  
59  
60

1  
2  
3 282 dealing with technology and systems that residents were more proficient at.<sup>76</sup> These  
4  
5  
6 283 challenges were amplified by resident absences due to duty hour restrictions and continuity  
7  
8 284 clinics, highlighting the importance of considering the whole of the “curriculum” in residency  
9  
10 285 when designing educational experiences. A qualitative study of Internal Medicine and Internal  
11  
12 286 Medicine-Pediatrics residents explored learning preferences regarding Noon Conference.<sup>77</sup>  
13  
14  
15 287 Residents wanted content that was clinically relevant, practical and linked to evidence. Shorter  
16  
17  
18 288 teaching sessions structured around cases and questions, and active learning with resident  
19  
20 289 engagement were desirable.

21  
22  
23 290 **c. Transfer between classroom and workplace**

24  
25  
26 291 Transfer of learning, defined as “the application and refinement of competencies in a context  
27  
28 292 that is different from that in which the competencies were acquired,” can be difficult.<sup>78</sup>  
29  
30 293 Transfer can be affected by characteristics of the classroom (relevance of classroom activities to  
31  
32 294 clinical practice), characteristics of the clinical workplace (attending-resident contact), or  
33  
34 295 resident characteristics (e.g. motivation). One qualitative study examined transfer between the  
35  
36 296 classroom and clinical workplace in first year General Practice residents in Belgium.<sup>31</sup> The study  
37  
38  
39 297 produced three key findings:

- 40  
41  
42  
43  
44 298 1. There are three distinct phases to the transfer process:
- 45  
46 299 a. Preparing for transfer of learning
  - 47  
48 300 b. Being at the workplace and connecting back to classroom-based learning
  - 49  
50 301 c. Reflecting on transfer of learning and continuing the process
- 51  
52  
53  
54  
55  
56  
57  
58  
59  
60

- 1  
2  
3 302 2. Ownership of responsibility arose as a prominent issue across stakeholder  
4  
5  
6 303 groups  
7  
8 304 3. Participants' conceptions about each phase of the transfer process reflected  
9  
10 305 their opinions about who was responsible for enabling the transfer  
11  
12

13 306 Gregor and Taylor have reviewed the literature on Morbidity and Mortality rounds, applying  
14  
15 307 experiential learning theory to demonstrate how this type of CBE can contribute to individual  
16  
17 308 development of clinical mastery as well as systems-based quality improvement.<sup>79</sup>  
18  
19  
20

## 21 309 **Discussion**

22  
23  
24  
25 310 The scholarship of classroom-based learning in postgraduate medical education is  
26  
27 311 hindered by a lack of common conceptual terminology. To find all relevant studies, we selected  
28  
29 312 an exhaustive list of text words, index terms and phrases and employed adjacency searches to  
30  
31 313 increase our search sensitivity. The heterogeneity of the literature around CBE is illustrated by  
32  
33 314 the many terms, often neologisms specific to a particular institution or discipline intended to  
34  
35 315 describe, or "brand" the educational program: Noon Conference, Academic Conference,  
36  
37 316 Academic Half Day, Academic Curriculum, etc. Other terms used to describe CBE are intended  
38  
39 317 to differentiate it from workplace learning, for example: didactic sessions, formal learning,  
40  
41 318 morning report, journal club, etc. These diverse and sometimes idiosyncratic terms pose a  
42  
43 319 challenge to systematically gathering and studying this body of literature, which is one of the  
44  
45 320 reasons we chose a scoping rather than systematic review. We propose that henceforth, the  
46  
47 321 umbrella term "classroom-based education" may facilitate better alignment of practice and  
48  
49 322 theory for future work.  
50  
51  
52  
53  
54  
55  
56  
57  
58  
59  
60

1  
2  
3 323 Further sub classifying the CBE literature using both the  
4  
5  
6 324 description/justification/clarification and experiences/trajectories/reifications (ETR)  
7  
8 325 frameworks shed light on which areas may benefit from clarification studies. Nearly all of the  
9  
10 326 description studies focused on the **experiences** offered to residents, such as the format or topic  
11  
12  
13 327 of CBE or residents' descriptions of their own experiences in CBE. Many justification studies  
14  
15 328 examined resident learning **trajectories**, albeit indirectly, through the association between  
16  
17  
18 329 resident attendance at CBE and in-training exam scores. These description and justification  
19  
20 330 studies generally examined CBE from an individual, cognitivist lens. While there is value in  
21  
22  
23 331 examining the individual experiences and trajectories of residents, CBE also has a substantial  
24  
25 332 impact on the recurring patterns of workplace activities that residents collectively participate  
26  
27  
28 333 in. For example, an impactful lecture on judicious ordering of a laboratory test such as serum  
29  
30 334 free light chains (SFLCO) may impact not only the ordering patterns of individual residents but  
31  
32  
33 335 also the entire clinical teaching unit in which these residents act as physicians, learners and  
34  
35 336 teachers of junior trainees. A central concept in the ETR framework is that acting and learning  
36  
37  
38 337 are part of the same process.<sup>5</sup> Clarification studies largely focused their analysis at the  
39  
40 338 **reification** level by examining how CBE in residency affects practice and vice versa. For  
41  
42  
43 339 example, resident AHD, in combination with other resident absences due to duty hour  
44  
45 340 restrictions and continuity clinics has unintended system outcomes of emotional strain and  
46  
47 341 patient safety concerns for attending physician faculty members.<sup>76</sup>

50 342 Studying CBE in residency inevitably illuminates service-education tensions such as  
51  
52  
53 343 these. Socio-cultural theories such as cultural historical activity theory (CHAT), practice  
54  
55 344 architectures, and situated learning are highly relevant in examining these tensions.<sup>4</sup> Residents  
56  
57  
58  
59  
60

1  
2  
3 345 participate in CBE primarily for knowledge acquisition but also value the social aspects,  
4  
5  
6 346 including peer support and forming a community of practice.<sup>3</sup> Peters et al. argue convincingly  
7  
8 347 in favor of considering transfer of learning between classroom and workplace as a contextual,  
9  
10 348 socially-mediated process rather than simply an individual and cognitive process.<sup>31</sup> An  
11  
12  
13 349 investigator examining the various topics “covered” in CBE through the lens of cultural-  
14  
15 350 historical activity theory, which uses the educational system rather than the individual learner  
16  
17  
18 351 as the unit of analysis might ask how the various components of PGME fit together, and what  
19  
20 352 role CBE might play in relation to other components such as workplace learning and self-study.  
21  
22  
23 353 Many papers refer to CBE as a “curriculum” when in fact CBE is better viewed as one aspect of  
24  
25 354 the residency curriculum. Practice architectures could speak to the material and economic  
26  
27  
28 355 conditions in which CBE is planned and implemented. Through this lens, one can interpret the  
29  
30 356 concerns expressed by faculty about resident service lost <sup>76</sup> as the main cost of CBE rather than  
31  
32 357 surface costs, such as faculty time, food and facility fees.

35  
36 358 CBE is ultimately a reification both of the goals of the residency program and the  
37  
38 359 educational needs of residents. Residents and faculty view CBE as both a key process by which  
39  
40 360 their training programs enact their commitment to education, and a product thereof. <sup>7,80,</sup>  
41  
42  
43 361 Activity that occurs in the workplace is determined primarily by the needs of patients and the  
44  
45 362 health care system, and only secondarily by the teaching and learning concerns of faculty and  
46  
47  
48 363 residents. The classroom-based component is where faculty can exercise more control over the  
49  
50 364 format and content of teaching, and this control may be used to carry out accreditation  
51  
52  
53 365 requirements in addition to primary teaching concerns. Both within and beyond these two  
54  
55 366 spaces of classroom and workplace, residents themselves exercise agency in determining their

1  
2  
3 367 own learning trajectories. Importantly, medical education must complement and enhance  
4  
5  
6 368 rather than thwart the healthcare system in which it occurs.<sup>1</sup>  
7

### 8 9 369 **Limitations**

10  
11  
12 370 Nearly all the studies included in this review were from Canada and the United States, likely  
13  
14 371 due to the focus on Academic Half Days and Noon Conferences, which are largely confined to  
15  
16  
17 372 North America, as well as the English language search restriction. CBE in PGME is a difficult  
18  
19 373 topic to search for, as there is a wide variety of terminology used, and the search strategy used  
20  
21  
22 374 for this review was not exhaustive for other types of CBE, particularly those outside of North  
23  
24 375 America.  
25

### 26 27 376 **Future work**

28  
29  
30 377 This review provides an important foundation for research in Postgraduate Medical Education  
31  
32  
33 378 by mapping a large body of literature on this topic. Future studies may likewise map or  
34  
35 379 synthesize the types of CBE not exhaustively reviewed in the present study. Aligning faculty  
36  
37  
38 380 and resident goals in CBE is one priority for future study; faculty are often inclined to provide  
39  
40 381 comprehensive overviews of their topics during lectures, whereas residents desire a few key  
41  
42  
43 382 points or clinical pearls.<sup>3</sup> Focusing on threshold concepts, which are “portals of entry into  
44  
45 383 expertise” during classroom time, may present one opportunity for aligning faculty and resident  
46  
47 384 goals.<sup>81,82</sup> Transfer of learning between classroom and workplace can be challenging.<sup>31</sup>  
48  
49  
50 385 Debriefing to facilitate transfer of learning between simulation and workplace has recently  
51  
52  
53 386 been described,<sup>83</sup> and this framework could potentially be applied to transfer between  
54  
55 387 classroom and workplace. Studying transfer underscores the non-integration of classroom-

1  
2  
3 388 based learning with workplace learning because it distinguishes between learning in one place  
4  
5  
6 389 (classroom) and applying it in another (workplace). Integration of CBE, workplace learning and  
7  
8 390 self-directed learning or self-study are important considerations for future study.<sup>84</sup> As the  
9  
10 391 COVID-19 pandemic has accelerated and expanded the role of online/e-learning in many  
11  
12  
13 392 residency programs, the distinct role of face to face learning should be re-evaluated.<sup>24</sup>  
14  
15

## 16 393 **Conclusions**

17  
18  
19 394 This review provides an overview of the work already done on the topic of classroom-based  
20  
21  
22 395 learning in PGME, as well as a common vocabulary and framework for future research  
23  
24  
25 396 questions. Much of the existing literature is either a description of various aspects of CBE or a  
26  
27 397 justification of particular approaches to teaching and learning; relatively few studies aim to  
28  
29 398 clarify how and why CBE works. The relative merits of various approaches to format and  
30  
31  
32 399 content have been well explored. Benefits of blocked formats such as academic half days  
33  
34 400 include improved attendance, more opportunity for social interaction/peer support, and  
35  
36  
37 401 opportunity for activities other than lectures (such as simulation). Dispersed formats such as  
38  
39 402 noon conferences are less disruptive to clinical service and may be beneficial for long term  
40  
41  
42 403 retention. Clinical work, or “service” and classroom-based formal “education” are often  
43  
44 404 perceived to be in tension with each other. However, from an educational perspective these  
45  
46  
47 405 two aspects of PGME represent ends of a continuum of formal and informal learning rather  
48  
49 406 than opposing types of activities. Classroom based learning in postgraduate medical education  
50  
51  
52 407 has been explored extensively from an individual, cognitivist perspective. Future studies using  
53  
54  
55  
56  
57  
58  
59  
60



1  
2  
3 408 a socio-cultural lens to examine CBE or examining the interplay of CBE with workplace learning,  
4  
5 409 may help clarify the best use of time and resources in this aspect of resident education.  
6  
7

8  
9 410 **Statements:**

10  
11  
12 411 **Affiliations:** Centre for Health Education Scholarship (CHES), University of British Columbia  
13  
14  
15 412 (Chen, Quach), Division of Hematology, University of British Columbia (Chen), Department of  
16  
17 413 Obstetrics and Gynaecology, University of British Columbia (Dayan), Biomedical Branch Library,  
18  
19  
20 414 University of British Columbia (Giustini), School of Health Professions Education (SHE), Faculty  
21  
22 415 of Health Medicine and Life Sciences, Maastricht University (Teunissen), Department of  
23  
24  
25 416 Obstetrics and Gynecology, Maastricht University Medical Centre, Maastricht, Netherlands  
26  
27

28 417 **Contributors:** All authors designed the review, wrote and edited the manuscript. DG  
29 418 conducted the literature the search. LC, TQ selected the papers. PT, LC, TQ and RD analyzed  
30 419 the data.  
31

32  
33 420 **Funding:** This work was supported by the Hal Kettleon Hematology Research Fund and the  
34 421 UBC Hematology Research Program.  
35

36 422 **Content licence:** This is an Open Access article distributed in accordance with the terms of the Creative Commons Attribution (CC BY-NC-ND  
37 423 4.0) licence, which permits use, distribution and reproduction in any medium, provided that the original publication is properly cited, the use is  
38 424 noncommercial (i.e., research or educational use), and no modifications or adaptations are made. See: <https://creativecommons.org/licenses/by-nc-nd/4.0/>  
39  
40 425 **Competing interests:** The authors declare no competing interests.  
41

42 426 **Data sharing:** All data presented are available in the published record.  
43  
44 427

428 **References**

- 429 1. Teunissen PW, Scheele F, Scherpbier AJA, et al. How residents learn: qualitative evidence for  
430 the pivotal role of clinical activities. *Med Educ.* 2007;41:763-70.
- 431 2. Teunissen PW, Boor K, Scherpbier AJ, et al. Attending doctors' perspectives on how residents  
432 learn. *Med Educ.* 2007;41:1050-8.
- 433 3. Chen LY, McDonald JA, Pratt DD, Wisener KM, Jarvis-Selinger S. Residents' views of the role of  
434 classroom-based learning in graduate medical education through the lens of academic half days.  
435 *Acad Med.* 2015;90:532-8.
- 436 4. Cleland J, Durning SJ. Education and service: how theories can help in understanding tensions.  
437 *Med Educ.* 2019;53:42-55.
- 438 5. Teunissen PW. Experience, trajectories, and reifications: an emerging framework of practice-  
439 based learning in healthcare workplaces. *Adv Health Sci Educ Theory Pract.* 2015;20:843-56.
- 440 6. Wenger EC. *Communities of Practice: Learning, Meaning, and Identity.* Cambridge: Cambridge  
441 University Press; 1998.
- 442 7. Chen LYC, Hubinette MM. Exploring the role of classroom-based learning in professional identity  
443 formation of family practice residents using the experiences, trajectories, and reifications  
444 framework. *Med Teach.* 2017;39:876-82.
- 445 8. Billett S. Learning through health care work: premises, contributions and practices. *Med Educ.*  
446 2016;50:124-31.
- 447 9. Dornan T. Workplace learning. *Perspect Med Educ.* 2012;1:15-23.
- 448 10. van de Wiel MW, Van den Bossche P, Janssen S, Jossberger H. Exploring deliberate practice in  
449 medicine: how do physicians learn in the workplace? *Adv Health Sci Educ Theory Pract.*  
450 2011;16:81-95.
- 451 11. Hurst JW. The overlecturing and underteaching of clinical medicine. *Arch Intern Med.*  
452 2004;164:1605-8.
- 453 12. Masters K. Edgar Dale's Pyramid of Learning in medical education: a literature review. *Med*  
454 *Teach.* 2013;35:e1584-93.
- 455 13. Masters K. Nipping an education myth in the bud: Poh's brain activity during lectures. *Med*  
456 *Teach.* 2014;36:732-5.
- 457 14. ACGME. ACGME Common Program Requirements. 2017;  
458 [https://www.acgme.org/Portals/0/PFAssets/ProgramRequirements/CPRs\\_2017-07-01.pdf](https://www.acgme.org/Portals/0/PFAssets/ProgramRequirements/CPRs_2017-07-01.pdf).  
459 Accessed Dec 17, 2018, 2018.
- 460 15. CanRAC. General Standards of Accreditation for Residency Programs. Ottawa, ON: CanRAC;  
461 2018.
- 462 16. Sfard A. On Two Metaphors for Learning and the Dangers of Choosing Just One. *Educational*  
463 *Researcher.* 1998;27:4-13.
- 464 17. Arksey H, O'Malley L. Scoping studies: towards a methodological framework. *International*  
465 *journal of Social Research Methodology.* 2005;8:19-32.
- 466 18. Levac D, Colquhoun H, O'Brien KK. Scoping studies: advancing the methodology. *Implement Sci.*  
467 2010;5:69.
- 468 19. Sutton A, Clowes M, Preston L, Booth A. Meeting the review family: exploring review types and  
469 associated information retrieval requirements. *Health Information & Libraries Journal.*  
470 2019;36:202-22.
- 471 20. McGaghie WC. Varieties of Integrative Scholarship: Why Rules of Evidence, Criteria, and  
472 Standards Matter. *Academic Medicine.* 2015;90:294-302.
- 473 21. PRISMA Extension for Scoping Reviews (PRISMA-ScR): Checklist and Explanation. *Annals of*  
474 *Internal Medicine.* 2018;169:467-73.

- 1  
2  
3 475 22. Brydges R, Hatala R, Zendejas B, Erwin PJ, Cook DA. Linking simulation-based educational  
4 476 assessments and patient-related outcomes: a systematic review and meta-analysis. *Acad Med.*  
5 477 2015;90:246-56.  
6 478 23. Cook DA. The failure of e-learning research to inform educational practice, and what we can do  
7 479 about it. *Med Teach.* 2009;31:158-62.  
8 480 24. Maggio LA, Daley BJ, Pratt DD, Torre DM. Honoring Thyself in the Transition to Online Teaching.  
9 481 *Acad Med.* 2018;93:1129-34.  
10 482 25. Chen F, Lui AM, Martinelli SM. A systematic review of the effectiveness of flipped classrooms in  
11 483 medical education. *Med Educ.* 2017;51:585-97.  
12 484 26. King AM, Gottlieb M, Mitzman J, Dulani T, Schulte SJ, Way DP. Flipping the Classroom in  
13 485 Graduate Medical Education: A Systematic Review. *J Grad Med Educ.* 2019;11:18-29.  
14 486 27. Chen KS, Monrouxe L, Lu YH, et al. Academic outcomes of flipped classroom learning: a meta-  
15 487 analysis. *Med Educ.* 2018.  
16 488 28. Cook DA, Bordage G, Schmidt HG. Description, justification and clarification: a framework for  
17 489 classifying the purposes of research in medical education. *Med Educ.* 2008;42:128-33.  
18 490 29. Ksouri H, Balanant PY, Tadie JM, et al. Impact of morbidity and mortality conferences on analysis  
19 491 of mortality and critical events in intensive care practice. *Am J Crit Care.* 2010;19:135-45; quiz  
20 492 46.  
21 493 30. Marchalot A, Dureuil B, Veber B, et al. Effectiveness of a blended learning course and flipped  
22 494 classroom in first year anaesthesia training. *Anaesth Crit Care Pain Med.* 2018;37:411-5.  
23 495 31. Peters S, Clarebout G, van Nuland M, Aertgeerts B, Roex A. A Qualitative Exploration of Multiple  
24 496 Perspectives on Transfer of Learning Between Classroom and Clinical Workplace. *Teach Learn*  
25 497 *Med.* 2018;30:22-32.  
26 498 32. Limvorapitak W. Correlation of Academic Activity Attendance and Examination Scores of  
27 499 Internal Medicine Residents. *Journal of the Medical Association of Thailand= Chotmaihet*  
28 500 *thangphaet.* 2016;99:S10-S5.  
29 501 33. Dreyer J, Hannay J, Lane R. Teaching the management of surgical emergencies through a short  
30 502 course to surgical residents in East/Central Africa delivers excellent educational outcomes.  
31 503 *World J Surg.* 2014;38:830-8.  
32 504 34. Lin Y, Scott JW, Yi S, et al. Improving Surgical Safety and Nontechnical Skills in Variable-Resource  
33 505 Contexts: A Novel Educational Curriculum. *J Surg Educ.* 2018;75:1014-21.  
34 506 35. Stokes W, Ruzycski S, Jainarine R, Isaac D, Cole J. The Canada-Guyana medical education  
35 507 partnership: using videoconferencing to supplement post-graduate medical education among  
36 508 internal medicine trainees. *Can Med Educ J.* 2017;8:e18-e24.  
37 509 36. Chalk C. The academic half-day in Canadian neurology residency programs. *Can J Neurol Sci.*  
38 510 2004;31:511-3.  
39 511 37. Zweifler J, Ringel M, Maudlin RK, Blossom HJ. Extended educational sessions at three family  
40 512 medicine residency programs. *Acad Med.* 1996;71:1059-63.  
41 513 38. Dayan R, Ubhi J, Chen LYC. Simulation and Classroom-Based Learning in Obstetrics and  
42 514 Gynaecology Residency Training. *J Obstet Gynaecol Can.* 2018.  
43 515 39. Butler DJ, Brocato J, Yeazel M. Family Medicine Didactics Revisited. *Fam Med.* 2017;49:778-84.  
44 516 40. Durning SJ, Sweet JM, Cation LJ. Morning Report: an analysis of curricular content and  
45 517 comparison to national guidelines. *Teach Learn Med.* 2003;15:40-4.  
46 518 41. Stiles BM, Reece TB, Hedrick TL, et al. General surgery morning report: a competency-based  
47 519 conference that enhances patient care and resident education. *Curr Surg.* 2006;63:385-90.  
48 520 42. Brown PA, Hiremath S, Clark EG, Kwok ESH, McCudden C, Akbari A. Implementation and  
49 521 evaluation of structured nephrology morbidity and mortality conferences: a quality education  
50 522 report. *Int Urol Nephrol.* 2018;50:929-38.  
51  
52  
53  
54  
55  
56  
57  
58  
59  
60

- 1  
2  
3 523 43. Shifflette V, Mitchell C, Mangram A, Dunn E. Current approaches to journal club by general  
4 524 surgery programs within the Southwestern surgical congress. *J Surg Educ.* 2012;69:162-6.  
5 525 44. Bansal S, Marwa A, Kasturi K, Perez-Colon S. Improving paediatric residents' knowledge and  
6 526 perspectives regarding the insulin pump using a novel educational workshop. *Postgraduate*  
7 527 *Medical Journal.* 2018;94:87-91.  
8 528 45. Kavanagh EP, Cahill J, Arbuckle MR, et al. Psychopharmacology Prescribing Workshops: A Novel  
9 529 Method for Teaching Psychiatry Residents How to Talk to Patients About Medications. *Acad*  
10 530 *Psychiatry.* 2017;41:491-6.  
11 531 46. Shaffer R, Piro N, Katznelson L, Gephart MH. Practice transition in graduate medical education.  
12 532 *Clin Teach.* 2017;14:344-8.  
13 533 47. Salib S, Glowacki EM, Chilek LA, Mackert M. Developing a Communication Curriculum and  
14 534 Workshop for an Internal Medicine Residency Program. *South Med J.* 2015;108:320-4.  
15 535 48. Wong RY, Saber SS, Ma I, Roberts JM. Using television shows to teach communication skills in  
16 536 internal medicine residency. *BMC Med Educ.* 2009;9:9.  
17 537 49. Bhatt-Mackin SM, Gagliardi JP. "Flipping" the Academic Half-Day to Create an Opportunity for  
18 538 Faculty Development. *Acad Psychiatry.* 2017;40:617-9.  
19 539 50. Pentiuk S, Baker R. Development of a gastroenterology educational curriculum for pediatric  
20 540 residents using fellows as teachers. *Journal of pediatric gastroenterology and nutrition.*  
21 541 2012;54:281-4.  
22 542 51. Hill SJ, Butler DJ, Guse C. Conference formats in family practice residencies. *Fam Med.*  
23 543 2000;32:417-21.  
24 544 52. Cosimini MJ, Mackintosh L, Chang TP. Number needed to eat: pizza and resident conference  
25 545 attendance. *Medical Education.* 2016;50:1204-7.  
26 546 53. Nunneley CE, Fishman M, Sundheim KM, et al. Leading synchronous virtual teaching sessions.  
27 547 *Clin Teach.* 2020.  
28 548 54. Fraser T, Sargsyan Z, Baggett TP, Baggett M. Quantitative Study of the Characteristics of  
29 549 Effective Internal Medicine Noon Conference Presentations. *J Grad Med Educ.* 2016;8:185-90.  
30 550 55. McDonald FS, Zeger SL, Kolars JC. Associations of conference attendance with internal medicine  
31 551 in-training examination scores. *Mayo Clin Proc.* 2008;83:449-53.  
32 552 56. McDonald FS, Zeger SL, Kolars JC. Factors associated with medical knowledge acquisition during  
33 553 internal medicine residency. *J Gen Intern Med.* 2007;22:962-8.  
34 554 57. Meyer NB, Gaetke-Udager K, Shampain KL, Spencer A, Cohan RH, Davenport MS. (Lack of)  
35 555 Measurable Clinical or Knowledge Gains From Resident Participation in Noon Conference. *Acad*  
36 556 *Radiol.* 2018;25:719-26.  
37 557 58. Gene Hern H, Jr., Wills C, Alter H, et al. Conference attendance does not correlate with  
38 558 emergency medicine residency in-training examination scores. *Acad Emerg Med.* 2009;16 Suppl  
39 559 2:S63-6.  
40 560 59. Cacamese SM, Eubank KJ, Hebert RS, Wright SM. Conference attendance and performance on  
41 561 the in-training examination in internal medicine. *Med Teach.* 2004;26:640-4.  
42 562 60. FitzGerald JD, Wenger NS. Didactic teaching conferences for IM residents: who attends, and is  
43 563 attendance related to medical certifying examination scores? *Acad Med.* 2003;78:84-9.  
44 564 61. Eid A, Hsieh P, Shah P, Wolff R. Cross-sectional longitudinal study of the academic half-day  
45 565 format in a hematology-oncology fellowship training program. *BMC Med Educ.* 2015;15:139.  
46 566 62. Ha D, Faulx M, Isada C, et al. Transitioning from a noon conference to an academic half-day  
47 567 curriculum model: effect on medical knowledge acquisition and learning satisfaction. *J Grad*  
48 568 *Med Educ.* 2014;6:93-9.

- 1  
2  
3 569 63. Randall MH, Schreiner AD, Clyburn EB, Rockey DC, Duckett A. Effects of an Academic Half Day in  
4 570 a Residency Program on Perceived Educational Value, Resident Satisfaction and Wellness. *The*  
5 571 *American journal of the medical sciences*. 2020.  
6 572 64. Raman M, McLaughlin K, Violato C, Rostom A, Allard JP, Coderre S. Teaching in small portions  
7 573 dispersed over time enhances long-term knowledge retention. *Med Teach*. 2010;32:250-5.  
8 574 65. House H, Monuteaux MC, Nagler J. A randomized educational interventional trial of spaced  
9 575 education during a pediatric rotation. *AEM education and training*. 2017;1:151-7.  
10 576 66. Di Genova T, Valentino PL, Gosselin R, Bhanji F. The Academic Half-Day redesigned: Improving  
11 577 generalism, promoting CanMEDS and developing self-directed learners. *Paediatr Child Health*.  
12 578 2015;20:30-4.  
13 579 67. Sawatsky AP, Berlacher K, Granieri R. Using an ACTIVE teaching format versus a standard lecture  
14 580 format for increasing resident interaction and knowledge achievement during noon conference:  
15 581 a prospective, controlled study. *BMC Med Educ*. 2014;14:129.  
16 582 68. Mickelson JJ, Kaplan WE, Macneily AE. Active learning: a resident's reflection on the impact of a  
17 583 student-centred curriculum. *Can Urol Assoc J*. 2009;3:399-402.  
18 584 69. Sawatsky AP, Zickmund SL, Berlacher K, Lesky D, Granieri R. Understanding the challenges to  
19 585 facilitating active learning in the resident conferences: a qualitative study of internal medicine  
20 586 faculty and resident perspectives. *Med Educ Online*. 2015;20:27289.  
21 587 70. Volerman A, Poepelman RS. A pilot study of team-based learning in one-hour pediatrics  
22 588 residency conferences. *BMC Med Educ*. 2019;19:266.  
23 589 71. Rucker SY, Ozdogan Z, Al Achkar M. Flipped classroom model for learning evidence-based  
24 590 medicine. *Adv Med Educ Pract*. 2017;8:619-25.  
25 591 72. Rose E, Claudius I, Tabatabai R, Kearl L, Behar S, Jhun P. The Flipped Classroom in Emergency  
26 592 Medicine Using Online Videos with Interpolated Questions. *J Emerg Med*. 2016;51:284-91 e1.  
27 593 73. Zeller M, Cristancho S, Mangel J, Goldszmidt M. Back to Anatomy: Improving Landmarking  
28 594 Accuracy of Clinical Procedures Using a Novel Approach to Procedural Teaching. *South Med J*.  
29 595 2015;108:310-7.  
30 596 74. Batalden MK, Warm EJ, Logio LS. Beyond a curricular design of convenience: replacing the noon  
31 597 conference with an academic half day in three internal medicine residency programs. *Acad Med*.  
32 598 2013;88:644-51.  
33 599 75. Ritchie L, Kulig E, Seltz LB. Faculty Teachers' Perspectives of Resident Academic Half Day.  
34 600 *Medical Science Educator*. 2018.  
35 601 76. Wagoner H, Seltz B. Attending Physicians' Perspectives of Resident Academic Half Day. *Teach*  
36 602 *Learn Med*. 2019:1-9.  
37 603 77. Sawatsky AP, Zickmund SL, Berlacher K, Lesky D, Granieri R. Understanding resident learning  
38 604 preferences within an internal medicine noon conference lecture series: a qualitative study. *J*  
39 605 *Grad Med Educ*. 2014;6:32-8.  
40 606 78. Peters S, Clarebout G, Diemers A, et al. Enhancing the connection between the classroom and  
41 607 the clinical workplace: A systematic review. *Perspect Med Educ*. 2017;6:148-57.  
42 608 79. Gregor A, Taylor D. Morbidity and Mortality Conference: Its Purpose Reclaimed and Grounded in  
43 609 Theory. *Teach Learn Med*. 2016;28:439-47.  
44 610 80. Kesselheim JC, Schwartz A, Boyer D, Education ALSGo, Service. Integrating Education and Service  
45 611 in Pediatric Residency Training: Results of a National Survey. *Academic pediatrics*. 2017;17:907-  
46 612 14.  
47 613 81. Chen LYC, Poole G. Grappling with troublesome knowledge. *Med Educ*. 2018;52:584-6.  
48 614 82. Chen LYC, Quach TTT. COVID-19 cytokine storm syndrome: a threshold concept. *The Lancet*  
49 615 *Microbe*. 2021;2:e49-e50.

- 1  
2  
3 616 83. Riviere E, Jaffrelot M, Jouquan J, Chiniara G. Debriefing for the Transfer of Learning: The  
4 617 Importance of Context. *Acad Med*. 2019;94:796-803.
- 5 618 84. Sawatsky AP, Ratelle JT, Bonnes SL, Egginton JS, Beckman TJ. Faculty Support for Self-Directed  
6 619 Learning in Internal Medicine Residency: A Qualitative Study Using Grounded Theory. *Acad Med*.  
7 620 2018;93:943-51.
- 8 621 85. Barnwell JC, Halvorson JJ, Teasdall RD, Carroll EA. Finding Value in Surgical Didactics:  
9 622 Longitudinal Resident Feedback From Case-Based and Traditional Lectures in an Orthopaedic  
10 623 Residency. *J Surg Educ*. 2017;74:61-7.
- 11 624 86. Klein D, Schipper S. Family medicine curriculum: improving the quality of academic sessions. *Can*  
12 625 *Fam Physician*. 2008;54:214-8.
- 13 626 87. Moreno MA, Kota R, McIntosh GC, Frohna JG. PEARLs of Wisdom: Impact of a New Block  
14 627 Conference on Pediatrics Resident Attendance, Satisfaction, and Learning. *J Grad Med Educ*.  
15 628 2013;5:323-6.
- 16 629 88. Naumburg EH, Harp J. Another program's use of extended teaching sessions. *Acad Med*.  
17 630 1997;72:160.
- 18 631 89. McNeill M, Ali SK, Banks DE, Mansi IA. Morning report: can an established medical education  
19 632 tradition be validated? *J Grad Med Educ*. 2013;5:374-84.
- 20 633 90. Sandal S, Iannuzzi MC, Knohl SJ. Can we make grand rounds "grand" again? *J Grad Med Educ*.  
21 634 2013;5:560-3.
- 22 635 91. Schynoll G, Irish E, Wayne J, Smith R. Feasibility of a Comprehensive Medical Knowledge  
23 636 Curriculum in Internal Medicine Using Team-Based Learning. *Journal of graduate medical*  
24 637 *education*. 2018;10:78-83.
- 25 638 92. Acosta A, Azzalin A, Emmons CJ, Shuster JJ, Jay M, Lo MC. Improving residents' clinical approach  
26 639 to obesity: impact of a multidisciplinary didactic curriculum. *Postgrad Med J*. 2014;90:630-7.
- 27 640 93. Al Achkar M, Hanauer M, Colavecchia C, Seehusen DA. Interprofessional education in graduate  
28 641 medical education: survey study of residency program directors. *BMC Med Educ*. 2018;18:11.
- 29 642 94. Audcent TA, Macdonnell HM, Moreau KA, et al. Development and evaluation of global child  
30 643 health educational modules. *Pediatrics*. 2013;132:e1570-6.
- 31 644 95. Bowman J, Duran A, Duffy B, Gladding S, Baum K. Teaching high-value care: a novel morning  
32 645 report. *The clinical teacher*. 2015;12:165-70.
- 33 646 96. Clay RD, Lee EC, Kurtzman MF, Dversdal RK. Teaching the internist to see: effectiveness of a 1-  
34 647 day workshop in bedside ultrasound for internal medicine residents. *Crit Ultrasound J*.  
35 648 2016;8:11.
- 36 649 97. Denizard-Thompson N, Feiereisel KB, Pedley CF, Burns C, Campos C. Musculoskeletal Basics: The  
37 650 Shoulder and the Knee Workshop for Primary Care Residents. *MedEdPORTAL*. 2018;14:10749-.
- 38 651 98. Juo YY, Lewis C, Hanna C, Reber HA, Tillou A. An Innovative Approach for Familiarizing Surgeons  
39 652 with Malpractice Litigation. *J Surg Educ*. 2019;76:127-33.
- 40 653 99. Pembroke CA, Alfieri J, Biron A, Freeman C, Hijal T. Creation of an educational quality  
41 654 improvement program for radiation oncology residents. *Pract Radiat Oncol*. 2018;8:81-9.
- 42 655 100. Richardson KM, Singh J, Muñoz D, Damp JB, Mendes LA. Improving Practice Guideline  
43 656 Adherence Through Peer Feedback: Impact of an Ambulatory Cardiology Curriculum. *Teaching*  
44 657 *and Learning in Medicine*. 2018;30:328-36.
- 45 658 101. Salib S, Valencia V, Moreno A. And Now, Please Sign on the Dotted Line: Teaching Residents  
46 659 About Professional Life After Residency. *South Med J*. 2018;111:256-60.
- 47 660 102. Solbach-Sabbach C, Adar T, Alperin M, Karkabi K, Levkovich I. Engaging family medicine residents  
48 661 in research training: An innovative research skills program in Israel. *Education for health*  
49 662 *(Abingdon, England)*. 2019;32:79-83.

- 1  
2  
3 663 103. Tam J, Wadhwa A. A Child With Limb Pain: A Case-Based Learning Module and Teaching  
4 664 Resource for Pediatric Infectious Diseases. *MedEdPORTAL*. 2017;13:10605-.
- 5 665 104. Thomas KG, Thomas MR, York EB, Dupras DM, Schultz HJ, Kolars JC. Teaching evidence-based  
6 666 medicine to internal medicine residents: the efficacy of conferences versus small-group  
7 667 discussion. *Teach Learn Med*. 2005;17:130-5.
- 8 668 105. Zanotti K, Somasegar S, Hooper MW, Hopp E. Improving Value-Based Care Education in a  
9 669 Fellowship by Incorporating ACGME Competencies. *Journal of graduate medical education*.  
10 670 2019;11:668-73.
- 11 671 106. Cosimini MJ, Mackintosh L, Chang TP. Number needed to eat: pizza and resident conference  
12 672 attendance. *Med Educ*. 2016;50:1204-7.
- 13 673 107. Smith J, Zaffiri L, Clary J, Davis T, Bosslet GT. The Effect of Paging Reminders on Fellowship  
14 674 Conference Attendance: A Multi-Program Randomized Crossover Study. *Journal of graduate  
15 675 medical education*. 2016;8:372-7.
- 16 676 108. Mehta ST, Agarwal C, Siddiqi F, Rockwell WB, Gociman BR. The Benefit of a Formal Plastic  
17 677 Surgery In-Service Conference. *J Surg Educ*. 2018;75:1058-61.
- 18 678 109. Picciano A, Winter R, Ballan D, Birnberg B, Jacks M, Laing E. Resident acquisition of knowledge  
19 679 during a noontime conference series. *Fam Med*. 2003;35:418-22.
- 20 680 110. Winter RO, Picciano A, Birnberg B, et al. Resident knowledge acquisition during a block  
21 681 conference series. *Fam Med*. 2007;39:498-503.
- 22 682 111. Franklin CC, Bosch PP, Grudziak JS, et al. Does a Weekly Didactic Conference Improve Resident  
23 683 Performance on the Pediatric Domain of the Orthopaedic In-Training Examination? *J Pediatr  
24 684 Orthop*. 2017;37:149-53.
- 25 685 112. Ozuah PO, Curtis J, Stein RE. Impact of problem-based learning on residents' self-directed  
26 686 learning. *Arch Pediatr Adolesc Med*. 2001;155:669-72.
- 27 687 113. Parikh JA, McGory ML, Ko CY, Hines OJ, Tillou A, Hiatt JR. A structured conference program  
28 688 improves competency-based surgical education. *American journal of surgery*. 2008;196:273-9.
- 29 689 114. Riddell J, Jhun P, Fung CC, et al. Does the Flipped Classroom Improve Learning in Graduate  
30 690 Medical Education? *J Grad Med Educ*. 2017;9:491-6.
- 31 691 115. Robbins R, Sullivan S, Smith B. Implementation of an academic half day in a vascular surgery  
32 692 residency program improves trainee and faculty satisfaction with surgical indications  
33 693 conference. *Surgery*. 2018;163:1197-200.
- 34 694 116. Zastoupil L, McIntosh A, Sopfe J, et al. Positive Impact of Transition From Noon Conference to  
35 695 Academic Half Day in a Pediatric Residency Program. *Academic pediatrics*. 2017;17:436-42.
- 36 696 117. Armson H, Wycliffe-Jones K, Mackay MP, Roder S. Academic Half-Days: Facilitated Small Groups  
37 697 to Promote Interactive Learning.
- 38 698 118. Goyal A, Garibaldi B, Liu G, Desai S, Manesh R. Morning report innovation: Case Oriented Report  
39 699 and Exam Skills. *Diagnosis (Berl)*. 2019;6:79-83.
- 40 700 119. Mishra K, Snow-Lisy DC, Ross J, Goldfarb DA, Goldman H, Campbell SC. Evaluation of a case-  
41 701 based urology learning program. *Urology*. 2013;82:1207-10.
- 42 702 120. Pereira J, Palacios M, Collin T, et al. The impact of a hybrid online and classroom-based course  
43 703 on palliative care competencies of family medicine residents. *Palliat Med*. 2008;22:929-37.
- 44 704 121. Tanaka P, Yanez D, Lemmens H, et al. Impact of an Innovative Classroom-Based Lecture Series  
45 705 on Residents' Evaluations of an Anesthesiology Rotation. *Anesthesiology Research and Practice*.  
46 706 2016;2016:8543809.
- 47 707 122. Tarabichi S, DeLeon M, Krumrei N, Hanna J, Maloney Patel N. Competition as a Means for  
48 708 Improving Academic Scores and Attendance at Education Conference. *J Surg Educ*. 2018.
- 49  
50  
51  
52  
53  
54  
55 709  
56  
57  
58  
59  
60

1  
2  
3  
4  
5  
6  
7  
8  
9  
10  
11  
12  
13  
14  
15  
16  
17  
18  
19  
20  
21  
22  
23  
24  
25  
26  
27  
28  
29  
30  
31  
32  
33  
34  
35  
36  
37  
38  
39  
40  
41  
42  
43  
44  
45  
46  
47  
48  
49  
50  
51  
52  
53  
54  
55  
56  
57  
58  
59  
60

710

Confidential



711 **Table 1: Description studies of classroom based learning (CBE)**

| <b>Format of CBE</b>                                                                                                                      |
|-------------------------------------------------------------------------------------------------------------------------------------------|
| Barnwell et al., 2017 <sup>85</sup> – descriptive study of case based didactic sessions in orthopedic surgery (Experiences)               |
| Brown et al., 2018 <sup>42</sup> – descriptive study of morbidity and mortality rounds in Urology (Experiences)                           |
| Chalk, 2004 <sup>36</sup> – survey of AHDs in Canadian neurology program (Experiences)                                                    |
| Klein and Schipper, 2008 <sup>86</sup> – descriptive study of family medicine and self-study (Experiences)                                |
| Moreno et al., 2013 <sup>87</sup> – describes the switch from dispersed to blocked (Experiences, Trajectories)                            |
| Naumburg and Harp, 1997 <sup>88</sup> - early description of AHDs in family medicine (Experiences)                                        |
| Durning et al., 2003 <sup>40</sup> – descriptive study of morning report in internal medicine (Experiences)                               |
| McNeill et al., 2013 <sup>89</sup> – morning report in internal medicine (Experiences)                                                    |
| Ksouri et al., 2010 <sup>29</sup> – descriptive study of morbidity and mortality rounds for critical care residents (Experiences)         |
| Sandal et al., 2013 <sup>90</sup> – descriptive study of grand rounds (Experiences)                                                       |
| Schynoll et al., 2018 <sup>91</sup> – describes the implementation of a team-based learning curriculum in Internal Medicine (Experiences) |
| Stiles et al., 2006 <sup>41</sup> – description of morning report in General Surgery (Experiences)                                        |
| <b>CBE Content and Topics</b>                                                                                                             |
| Acosta et al., 2014 <sup>92</sup> – obesity medicine in internal medicine (Experiences)                                                   |
| Al Achkar et al., 2018 <sup>93</sup> – survey of interprofessional education (Experiences)                                                |
| Audcent et al., 2013 <sup>94</sup> – global health in pediatrics (Experiences)                                                            |
| Bansal et al., <sup>44</sup> 2018 insulin pump knowledge in pediatrics (Experiences)                                                      |
| Bowman et al. 2015 <sup>95</sup> – teaching high value care in morning report for internal medicine (Experiences)                         |

1  
2  
3  
4 Clay et al., 2016<sup>96</sup> – ultrasound training for internal medicine (Experiences)  
5

6 Denizard-Thompson et al., 2018<sup>97</sup> –musculoskeletal examination for family medicine  
7 residents (Experiences)  
8

9  
10 Dreyer et al., 2014<sup>33</sup> – surgical emergencies in resource limited settings (Experiences)  
11

12 Juo et al., 2019<sup>98</sup> – malpractice litigation for surgery residents (Experiences)  
13

14 Kavanagh et al., 2017<sup>45</sup> – psychopharmacology prescribing workshops (Experiences)  
15

16 Lin et al., 2018<sup>34</sup> – improving surgical safety in variable resource settings (Trajectories)  
17

18 Pembroke et al., 2018<sup>99</sup> – quality improvement in radiation oncology (Experiences)  
19

20 Richardson et al., 2018<sup>100</sup> – ambulatory practice curriculum in cardiology fellowship  
21 (Experiences)  
22

23 Salib et al., 2015<sup>47</sup> – communication skills in internal medicine (Experiences)  
24

25 Salib et al., 2018<sup>101</sup> – transition to practice for internal medicine (Experiences)  
26

27 Shaffer et al., 2017<sup>46</sup> – transition to practice, multiple disciplines (Experiences)  
28

29 Shifflette et al., 2012<sup>43</sup> – journal clubs in surgery (Experiences)  
30

31 Solbach-Sabbach et al., 2019<sup>102</sup> – research in family medicine (Experiences)  
32

33 Tam and Wadhwa, 2017<sup>103</sup> – pediatric limb pain, infectious causes (Experiences)  
34

35 Thomas et al., 2005<sup>104</sup> – evidence-based medicine for internal medicine (Experiences)  
36

37 Zanotti et al., 2019<sup>105</sup> – value-based care in gynecologic oncology (Experiences)  
38  
39  
40  
41  
42

43 **Resources required for CBE**  
44

45 Bhatt-Mackin and Gagliardi, 2017<sup>49</sup> – faculty development in psychiatry (Reifications)  
46

47 Butler et al., 2017<sup>39</sup> – didactic sessions in family medicine (Experiences)  
48

49 Cosimini et al., 2016<sup>106</sup> – impact of food on attendance in pediatrics (Experiences)  
50

51 Hill et al., 2000<sup>51</sup> – survey of family medicine programs about CBE (Experiences)  
52

53 Nunneley et al., 2020<sup>53</sup>– synchronous virtual conferences for COVID-19 (Reifications)  
54  
55  
56  
57  
58  
59  
60

Pentiuk and Baker, 2012<sup>50</sup> – fellows as teachers in pediatric gastroenterology (Experiences)

Sawatsky et al., 2015<sup>69</sup>: challenges to active learning in internal medicine (Experiences)

Smith et al., 2016<sup>107</sup>: effect of paging reminders on conference attendance in multiple disciplines (Experiences)

Stokes et al., 2017<sup>35</sup> – residents as teachers in internal medicine in a Canada/Guyana collaboration (Experiences)

712 AHD: Academic Half Day

713

Confidential

714 **Table 2: Justification studies of classroom-based education (CBE)**

| Effectiveness of CBE                                                                                                                                                                                   |
|--------------------------------------------------------------------------------------------------------------------------------------------------------------------------------------------------------|
| <b>Conference attendance and exam scores:</b>                                                                                                                                                          |
| Cacamese et al., 2004 <sup>59</sup> – negative study of conference attendance and in-training exam scores in internal medicine (Trajectories)                                                          |
| Fitzgerald and Wenger, 2003 <sup>60</sup> – negative study of conference attendance and in-training exam scores in internal medicine (Trajectories)                                                    |
| Gene Hern et al., 2009 <sup>58</sup> –negative study of conference attendance and in-training exam scores in emergency medicine (Trajectories)                                                         |
| Limvorapitak, 2016 <sup>32</sup> – positive correlation of lecture attendance and in-training exam scores in internal medicine (Trajectories)                                                          |
| McDonald et al., 2007 <sup>56</sup> – positive study examining conference attendance and in-training exam scores in internal medicine (Trajectories)                                                   |
| McDonald et al., 2008 <sup>55</sup> – positive study of conference attendance and in-training exam scores in internal medicine (Trajectories)                                                          |
| Mehta et al., 2018 <sup>108</sup> – positive impact on exam scores before and after implementation of a weekly plastic surgery in-service conference (Trajectories)                                    |
| Meyer et al., 2018 <sup>57</sup> – negative study of conference attendance and exam scores in radiology (Trajectories)                                                                                 |
| Picciano et al., 2003 <sup>109</sup> – positive study of conference attendance on short term test scores in family medicine (Trajectories)                                                             |
| Winter et al., 2007 <sup>110</sup> – negative study of conference attendance and test scores in family medicine (Trajectories)                                                                         |
| <b>Blocked (AHD) vs. dispersed (conference) formats:</b>                                                                                                                                               |
| Eid et al., 2015 <sup>61</sup> – trend towards improved exam scores and resident satisfaction after transition from dispersed (noon conference) to blocked (AHD) in hematology/oncology (Trajectories) |
| Franklin et al., 2017 <sup>111</sup> – increased in-training exam scores after implementation of weekly pediatric orthopedic didactic sessions on in-training exam scores                              |
| Fraser et al., 2016 <sup>54</sup> – descriptive study of qualities of effective noon conference presentations in internal medicine (Experiences)                                                       |

1  
2  
3  
4 Ha et al., 2014<sup>62</sup>- increased in-training exam scores after transition from dispersed (noon conference)  
5 to blocked (AHD) CBE in internal medicine (Trajectories)  
6

7 House et al., 2017<sup>65</sup> – positive study of web-based spaced education in emergency medicine  
8 (Trajectories)  
9

10 Raman et al., 2010<sup>64</sup> – effectiveness: quasi-experimental study examining dispersed vs blocked  
11 format with better retention in dispersed arm (Trajectories)  
12  
13

14  
15 ***Resident perceptions of learning***  
16

17 Ozuah et al., 2001<sup>112</sup> – impact of problem-based learning on self-directed learning in pediatrics  
18 (Trajectories)  
19

20 Parikh et al., 2008<sup>113</sup> – positive impact of conference attendance on resident perceptions of  
21 competency (Experiences, Trajectories)  
22  
23

24 Randall et al., 2020<sup>63</sup> – positive impact of AHD on resident satisfaction and perception of learning in  
25 internal medicine  
26

27 Riddell et al., 2017<sup>114</sup> - crossover study of flipped vs traditional lecture in emergency medicine, mixed  
28 results (Trajectories)  
29  
30

31 Robbins et al., 2018<sup>115</sup> –resident satisfaction with AHD in vascular surgery (Experiences)  
32

33 Zastoupil et al., 2017<sup>116</sup> – positive impact of AHD on resident wellness (Experiences, Trajectories)  
34

35 Zweifler et al., 1996<sup>37</sup> – early study of transition from dispersed (noon conference) to blocked (AHD)  
36 CBE in family medicine (Trajectories)  
37  
38

39  
40 **Teaching strategies**  
41

42 Armson et al. 2020<sup>117</sup> – facilitated small group learning in family medicine (Trajectories)  
43

44 Di Genova et al., 2015<sup>66</sup> – application of andragogy to AHD in pediatrics (Experiences)  
45

46 Goyal et al., 2019<sup>118</sup> – case based morning report in internal medicine (Trajectories)  
47  
48

49 Marchalot et al., 2018<sup>30</sup> – flipped classrooms in anesthesia (Experiences)  
50

51 Mickelson et al., 2009<sup>68</sup> – application of andragogy to AHD in urology (Experiences)  
52  
53

54 Mishra et al., 2013<sup>119</sup> – e-learning in urology  
55

56 Pereira et al., 2008<sup>120</sup> – e-learning in palliative care for family medicine (Experiences)  
57  
58  
59  
60

Rose et al., 2016<sup>72</sup> – flipped classrooms in emergency medicine (Trajectories)

Rucker et al., 2017<sup>71</sup> – flipped classrooms for learning evidence-based medicine in internal medicine (Trajectories)

Sawatsky et al., 2014a<sup>67</sup> – ACTIVE learning in internal medicine (Trajectories)

Tanaka et al., 2016<sup>121</sup> – short daily lectures in anesthesia (Experiences)

Tarabichi et al., 2018<sup>122</sup> – competitive quizzes in surgery (Experiences)

Volerman and Poeppelman, 2019<sup>70</sup> – team based learning in pediatrics

Wong et al., 2009<sup>48</sup> – communication skills in internal medicine (Experiences)

Zeller et al., 2015<sup>73</sup> – video and simulation for teaching bone marrow biopsies in internal medicine (Trajectories)

715 AHD: Academic Half Day

716

717

718 **Table 3: Clarification studies of classroom-based education (CBE)**

| <b>Purpose of CBE</b>                                                                                                                                                                                                     |
|---------------------------------------------------------------------------------------------------------------------------------------------------------------------------------------------------------------------------|
| Batalden et al., 2013 <sup>74</sup> : mixed methods article describing transition from noon conference to AHD in three internal medicine programs – role of CBE and principles of effective implementation (Reifications) |
| Chen et al., 2015 <sup>3</sup> : qualitative study exploring the role of AHD in resident education in hematology, internal medicine and orthopedic surgery (Experiences and Reifications)                                 |
| Chen and Hubinette, 2017 <sup>7</sup> : qualitative study exploring the role of CBE in family practice professional identity formation through the ETR framework (Experiences, Trajectories and Reifications)             |
| <b>Faculty and resident perspectives on CBE</b>                                                                                                                                                                           |
| Ritchie et al., 2018 <sup>75</sup> : qualitative study describing faculty perspectives of AHD in pediatrics (Experiences)                                                                                                 |
| Sawatsky et al., 2014b <sup>77</sup> : qualitative study of resident learning preferences in internal medicine (Experiences)                                                                                              |
| Wagoner and Seltz, 2019 <sup>76</sup> : qualitative study of attending physicians' perspectives of AHD in pediatrics (Reifications)                                                                                       |
| <b>Transfer of learning from CBE to workplace</b>                                                                                                                                                                         |
| Gregor et al., 2016 <sup>79</sup> – considering morbidity and mortality rounds both in terms of individual development and systems change (Trajectories, Reifications)                                                    |
| Peters et al., 2018 <sup>31</sup> – transfer between workplace and classroom in internship (Trajectories, Reifications)                                                                                                   |

719 AHD: Academic Half Day

720

721

722

723

**Figure 1: Search Strategy for the Scoping Review**

Database: Ovid MEDLINE(R) and Epub Ahead of Print, In-Process, In-Data-Review & Other Non-Indexed Citations, Daily and Versions(R) <1946 to March 16, 2021>

Search Strategy:

- 
- 1 (academic adj5 "half day\*").mp. (38)
  - 2 (noon adj5 conference\*).mp. (57)
  - 3 1 or 2 (90)
  - 4 (classroom adj3 learning).mp. (782)
  - 5 didactic conference\*.mp. (52)
  - 6 daily lecture\*.mp. (12)
  - 7 educational conference\*.mp. (247)
  - 8 morning conference\*.mp. (10)
  - 9 resident lecture\*.mp. (16)
  - 10 or/4-9 (1116)
  - 11 exp Education, Medical, Graduate/ (72184)
  - 12 resident\*.mp. (200527)
  - 13 11 or 12 (246044)
  - 14 10 and 13 (168)
  - 15 3 or 14 (251)

\*\*\*\*\*



**Figure 2: PRISMA diagram of study identification and selection process**

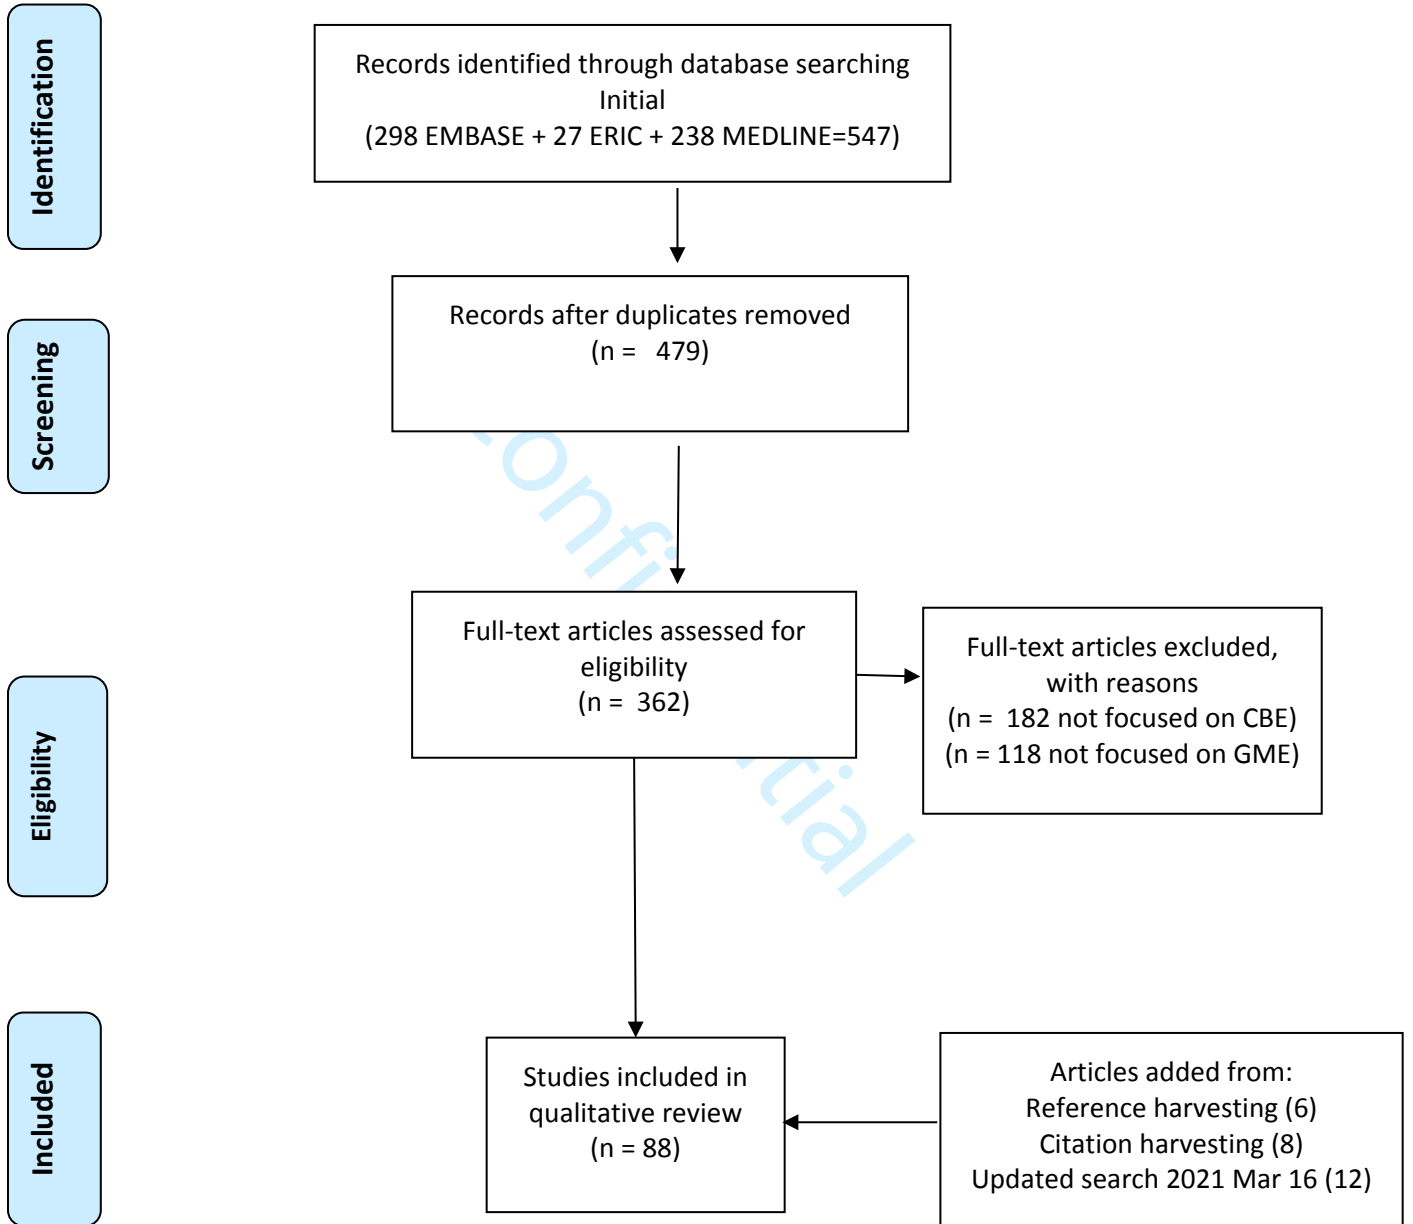

Supplement: open-2021-0203-original-submission.pdf [file open-2021-0203-original-submission.pdf]
